# Supplementary material
Source: PubMed Central journal article supplement (PMC7887750)
Supplement: pt0c00159_si_001.pdf [file pt0c00159_si_001.pdf]

# A transcriptomic Analysis of the Activity and Mechanism of Action of a Ruthenium(II)-Based Antimicrobial That Induces Minimal Evolution of Pathogen Resistance

Adam M Varney,<sup>1</sup> Kirsty L Smitten,<sup>2</sup> Jim A Thomas<sup>2\*</sup> and Samantha McLean<sup>1\*</sup>.<sup>1</sup> School of Science and Technology, Nottingham Trent University, Nottingham, NG11 8NS.

<sup>2</sup>Department of Chemistry, The University of Sheffield, Western Bank, Sheffield, S3 7HF.

\* Corresponding authors

| Contents                                                                                                                                                            | Page      |
|---------------------------------------------------------------------------------------------------------------------------------------------------------------------|-----------|
| S-1. Chemistry methods.....                                                                                                                                         | S-2       |
| S-1a. [Ru(3,4,7,8-tetramethyl-1,10-phenanthroline) <sub>2</sub> Cl <sub>2</sub> ] <sup>2+</sup> .....                                                               | S-2       |
| S-1b. [Ru(TMP) <sub>2</sub> ] <sub>2</sub> (tpphz)] <sup>4+</sup> .....                                                                                             | S-2       |
| S-1c. Anion metathesis.....                                                                                                                                         | S-2       |
| <br>                                                                                                                                                                |           |
| S-2. Supporting data.....                                                                                                                                           | S-3 – S-4 |
| Table S-1 - Primer sequences designed for transcriptomic analysis.....                                                                                              | S-3       |
| Table S-2 - Kinetic turbidimetric solubility plate readings.....                                                                                                    | S-4       |
| Figure S-1 – Variation in colony size of <i>Escherichia coli</i> after exposure to 1 <sup>4+</sup> .....                                                            | S-4       |
| Figure S-2 – Minimal inhibitory and bactericidal concentrations for <i>Escherichia coli</i> BL21 and porin knockout mutants after exposure to 1 <sup>4+</sup> ..... | S-4       |

## Supplementary 1 – Chemistry methods

The ligand TPPHZ was synthesised through established procedure.<sup>1</sup>

### S-1a. $[\text{Ru}(\text{3,4,7,8-tetramethyl-1,10-phenanthroline})_2\text{Cl}_2]^{2+}$ ,<sup>2</sup>

$\text{RuCl}_3 \cdot 3\text{H}_2\text{O}$  (1.14 g, 5.50 mmol), TMP (2.4 g, 10.16 mmol) and LiCl (1.47 g, 34.68 mmol) were heated for 8 h under reflux in DMF (19 mL). The reaction mixture was cooled to room temperature and acetone was added (100 mL). The solution was stored at 4 °C for 16 h forming a dark purple precipitate. The product was washed with water and ethanol and dried *in vacuo*. Mass = 2.07 g (3.21 mmol, 63.2 %) purple solid. MS  $m/z$  (%): 609.1 (62)  $[\text{M} - \text{Cl}]^+$ , 637.1 (100)  $[\text{M}]^+$  667.1 (44)  $[\text{M} + \text{Na}]^+$ . Carbon monoxide displaced one of the chlorines.

$[\text{M}-3(\text{PF}_6)]^{3+}$ .  $^1\text{H}$  NMR (MeCN- $d_6$ )  $\delta$  (splitting integration): 2.1 (s, 48H), 7.8 (s, 4H), 7.9 (t, 8H), 8.2 (dd, 4H), 8.4 (s, 8H)

### S-1b. $[\{\text{Ru}(\text{TMP})_2\}_2(\text{tpphz})]^{4+}$ ,<sup>3</sup>

$\text{Ru}(\text{TMP})_2\text{Cl}_2^{2+}$  (1.12 g, 1.73 mmol) and TPPHZ (0.260 g, 0.68 mmol) were added to a 1:1 solution of ethanol and water (80 mL). The solution was refluxed for 12 h under argon. After completion the reaction mixture was cooled to room temperature and stored at 4 °C for 16 h. The red solution was filtered, and ethanol removed by rotary evaporation. A saturating amount of  $\text{NH}_4\text{PF}_6$  was added; this caused the formation of a dark red precipitate. The precipitate was collected *via* vacuum filtration, washed with water and recrystallised in acetonitrile by addition of diethyl ether. The product was dried *in vacuo* and purified on an alumina column, solvent system: 95 % MeCN, 3 %  $d\text{H}_2\text{O}$  and 2 %  $\text{KNO}_3$ . Mass = 1.22 g (0.58 mmol, 85.7 % yield). MS;  $m/z$  (%): 911 (10)  $[\text{M} - 2(\text{PF}_6)]^{2+}$ , 559 (100)  $[\text{M}-3(\text{PF}_6)]^{3+}$ .  $^1\text{H}$  NMR (MeCN- $d_6$ )  $\delta$  (splitting integration): 2.1 (s, 48H), 7.8 (s, 4H), 7.9 (t, 8H), 8.2 (dd, 4H), 8.4 (s, 8H), 9.9 (dd, 4H).  $^1\text{H}$  NMR (Acetone- $d_6$ )  $\delta$  (splitting integration): 2.1 (dt, 48H), 8.0 (m, 4H), 8.1 (s, 4H), 8.2 (s, 4H), 8.52 (d, 4H), 8.6 (s, 8 H), 10.1 (d, 4H). Elemental analysis  $[\{\text{Ru}(\text{3, 4, 7, 8-Tetramethyl-1,10-phenanthroline})_2\}_2(\text{tpphz})](\text{PF}_6)_4 \cdot 5.5\text{H}_2\text{O}$ ,  $\text{C}_{88}\text{H}_{87}\text{N}_{14}\text{O}_5.5\text{Ru}_2\text{P}_4\text{F}_{24}$  Calculated: C; 47.93, H; 3.97, N; 8.89. Found C; 47.92, H; 3.83, N; 8.82. Accurate mass analysis:  $\text{C}_{88}\text{H}_{76}\text{N}_{14}[\text{102Ru}]_2^{4+}$  Calculated 383.1111. Found 383.1112.

### S-1c. Anion metathesis

The hexafluorophosphate salt of each complex was dissolved in the minimum volume of acetone, and a saturated solution of tetrabutylammonium chloride in acetone added. The resultant precipitated chloride salt was collected by filtration, washed with cold acetone, and dried *in vacuo*.

Supplementary 2 – Supporting data

Table S-1 - Primer sequences designed for transcriptomic analysis. Annealing temperature and GC percentage stated for each sequence.

| <b>Gene</b> |         | <b>tm</b> | <b>gc%</b> | <b>Sequence</b>        |
|-------------|---------|-----------|------------|------------------------|
| <i>hcaT</i> | Forward | 59.4      | 47.62      | cgctcggctatcact        |
|             | Reverse | 59.89     | 45.45      | gacgctccagaaaggtagaaaa |
| <i>idnT</i> | Forward | 60.61     | 45.45      | agggattgctttactcctgctt |
|             | Reverse | 59.91     | 45.45      | ttcactgaggtgacgacttta  |
| <i>recN</i> | Forward | 58.77     | 40.91      | acaactgaccatcagcaacttt |
|             | Reverse | 59.94     | 38.1       | catgccgctatgaaaatcaat  |
| <i>recA</i> | Forward | 60.37     | 40.91      | atggctatcgacgaaaacaaac |
|             | Reverse | 60.2      | 40.91      | catgatggagcctttaccaaat |
| <i>bhsA</i> | Forward | 59.43     | 36.36      | aaaaacgtaaaaaccctcatcg |
|             | Reverse | 59.35     | 45         | cgacttttggcctct        |
| <i>ibpA</i> | Forward | 60.2      | 36.36      | aacttgattatccccgcttt   |
|             | Reverse | 59.77     | 36.36      | atagcaatgcggtaatggttt  |
| <i>umuC</i> | Forward | 59.5      | 40.91      | atgttgccctctgtgatgtaa  |
|             | Reverse | 59.99     | 40.91      | caaccgtcattatcgatagca  |
| <i>yrbF</i> | Forward | 60.51     | 45.45      | gtctgtggcgaatttagtcgat |
|             | Reverse | 59.85     | 50         | agacggagtagcgtcgttttac |
| <i>spy</i>  | Forward | 59.98     | 50         | ctgcactgtttgtgcctctac  |
|             | Reverse | 60.37     | 47.62      | gaccgaactgcctttatggg   |
| <i>sdhA</i> | Forward | 59.88     | 45.45      | ccagtcagagaatttgatgcag |
|             | Reverse | 60.51     | 57.14      | cgggaagaccttagagagcag  |
| <i>ompF</i> | Forward | 61.2      | 54.55      | gtgatcgtccctgctctgtag  |
|             | Reverse | 59.97     | 45.45      | ccttgagaaataatgcagacc  |

**Table S-2 - Kinetic turbidimetric solubility plate readings – absorbance at 620 nm**

| Concentration $\mu\text{M}$ | $1^{4+}$ (1) |       |       | $1^{4+}$ (2) |       |       | Nicardipine (1) |       |       | Nicardipine (2) |       |       |
|-----------------------------|--------------|-------|-------|--------------|-------|-------|-----------------|-------|-------|-----------------|-------|-------|
| <b>0.2</b>                  | 0.130        | 0.123 | 0.149 | 0.132        | 0.125 | 0.152 | 0.435           | 0.504 | 0.540 | 0.499           | 0.531 | 0.514 |
| <b>2</b>                    | 0.039        | 0.054 | 0.061 | 0.053        | 0.045 | 0.040 | 0.171           | 0.195 | 0.186 | 0.195           | 0.192 | 0.175 |
| <b>4</b>                    | 0.012        | 0.012 | 0.012 | 0.012        | 0.011 | 0.013 | 0.002           | 0.009 | 0.018 | 0.004           | 0.021 | 0.009 |
| <b>20</b>                   | 0.005        | 0.007 | 0.006 | 0.006        | 0.006 | 0.006 | 0.000           | 0.000 | 0.000 | 0.000           | 0.000 | 0.000 |
| <b>40</b>                   | 0.001        | 0.002 | 0.002 | 0.002        | 0.002 | 0.001 | 0.000           | 0.000 | 0.000 | 0.000           | 0.000 | 0.000 |
| <b>100</b>                  | 0.000        | 0.001 | 0.001 | 0.001        | 0.001 | 0.000 | 0.000           | 0.000 | 0.000 | 0.000           | 0.000 | 0.000 |
| <b>200</b>                  | 0.000        | 0.001 | 0.001 | 0.001        | 0.001 | 0.000 | 0.000           | 0.000 | 0.000 | 0.000           | 0.000 | 0.000 |

**Figure S-1 - Variation in colony morphology of *Escherichia coli* after exposure to  $1^{4+}$**

Cultures exposed to  $1^{4+}$  consistently show differing colony size and morphology when plated onto rich medium in the absence of the compound. Microscopy images were taken using a GX Microscope L2000A at 40x magnification. (A-C) Images of typical colonies of *Escherichia coli*. (D-E) Images of colonies of *Escherichia coli* after exposure to  $1^{4+}$ .

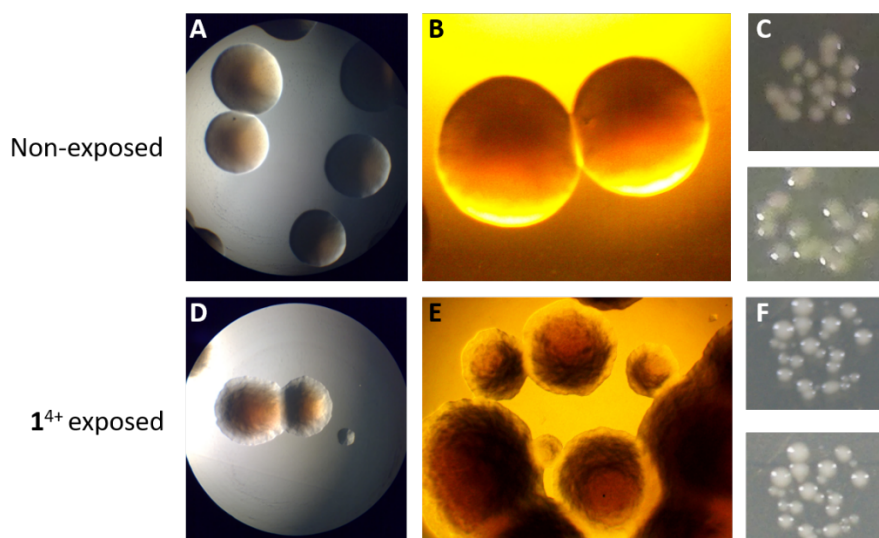

**Figure S-2 – Minimal inhibitory and bactericidal concentrations for *Escherichia coli* BL21 and porin knockout mutants after exposure to  $1^{4+}$ .**

| Strain                                        | MIC ( $\mu\text{M}$ ) $\pm$ SEM | MBC ( $\mu\text{M}$ ) $\pm$ SEM |
|-----------------------------------------------|---------------------------------|---------------------------------|
| BL21 Gold (DE3)                               | 0.91 $\pm$ 0.07                 | 1.39 $\pm$ 0.14                 |
| $\Delta ompA$                                 | 1.39 $\pm$ 0.14                 | 4.17 $\pm$ 0.89                 |
| $\Delta lamB$                                 | 0.87 $\pm$ 0.07                 | 1.74 $\pm$ 0.14                 |
| $\Delta ompF$                                 | 1.04 $\pm$ 0                    | 1.48 $\pm$ 0.07                 |
| $\Delta ompC$ - $\Delta ompF$                 | 1.04 $\pm$ 0                    | 2.43 $\pm$ 0.38                 |
| $\Delta ompC$ - $\Delta ompF$ - $\Delta lamB$ | 1.39 $\pm$ 0.14                 | 2.60 $\pm$ 0.43                 |

N = 3  $\pm$  SEM. Origin of strains<sup>4</sup>.

## Supplementary references

- (1) Bolger, J.; Gourdon, A.; Ishow, E.; Launay, J.-P. Mononuclear and Binuclear Tetrapyrrodo [3, 2-a: 2', 3'-C: 3'', 2''-H: 2''', 3'''-''J] Phenazine (Tpphz) Ruthenium and Osmium Complexes. *Inorg. Chem.* **1996**, *35*, 2937–2944.
- (2) Sullivan, B. P.; Salmon, D. J.; Meyer, T. J. Mixed Phosphine 2,2'-Bipyridine Complexes of Ruthenium. *Inorg. Chem.* **1978**, *17*, 3334–3341.
- (3) Rajput, C.; Rutkaite, R.; Swanson, L.; Haq, I.; Thomas, J. A. Dinuclear Monointercalating RuII Complexes That Display High Affinity Binding to Duplex and Quadruplex DNA. *Chem. Eur. J.* **2006**, *12*, 4611–4619.
- (4) Meuskens, I.; Michalik, M.; Chauhan, N.; Linke, D.; and Leo, J. L. A New Strain Collection for Improved Expression of Outer Membrane Proteins. *Front. Cell. Infect. Microbiol.* **2017**, *7* (464).
